# Supplementary material
Source: PubMed Central journal article supplement (PMC8776609)
Supplement: NIHMS1762561-supplement-1762561-sup_fig.pdf [file NIHMS1762561-supplement-1762561-sup_fig.pdf]

|         |                                                                                                  |      |
|---------|--------------------------------------------------------------------------------------------------|------|
| hsCNGB1 | MLGWVQRVLQPPTGPRKTKMQEEEEVEPEPEMEAEVEPEPNPEEAETESESMPPPESEFKEEVAVADPSPQETKEAALTSTISLRAQGA        | 90   |
| hsCNGB1 | EISEMNSPSSRRVLTWLMKGVKVPVQVHSITEDPAQILGHGSDTGTCTDEPNEALEAQDTRPGLRLLWLEQNLERVLPQPPKSSSEVW         | 180  |
| hsCNGB1 | RDEPAVATGAASDPAPPGRPQEMGPKLQARETPSLPTPIPLQKKEEPKEAPEPQPQGSQAQTSSLPPTRDPAFLVAVLWLRLEMLALPQP       | 270  |
| hsCNGB1 | VLHGKIGEQEPDPSGICDVQITISILPGGQVEPDLVLEVEVPPWDAHQDVSTSPQGTVEVVPAYEENKAVEKMPRELSRIEEKEDEEEEE       | 360  |
| hsCNGB3 | -----FKSLTKVVK-----                                                                              | 10   |
| hsCNGA1 | -----M                                                                                           | 1    |
| hsCNGA2 | -----                                                                                            | 0    |
| hsCNGA3 | -----                                                                                            | 0    |
| hsCNGA4 | -----                                                                                            | 0    |
| ceTAX-4 | -----                                                                                            | 0    |
| hsCNGB1 | EEEEEEEEEEVTVLLDSCVVSQVGVGQ-----SEEDGTRPQSTSDQKLWEEVGEAEKKEEAEKAEAEVVEVEEAEKPEQDWAET             | 443  |
| hsCNGB3 | -----VKPIENNNEQSSRRNEGSHSPNSQQTTA-----DE                                                         | 45   |
| hsCNGA1 | KLMSKNNININQOQSFV-TMPN--VIVPDIEKEI--RRMENGACSSFSDEDD-----DSA---STSSE-                            | 54   |
| hsCNGA2 | ---MT--EKTNGVKSSP-ANNHNNHAPPAIKANG---KDDHRTSSRPHSAAD-----DDTS---SELQRL                           | 53   |
| hsCNGA3 | -----MAKINTQYSHP-SRTH--LKVKTSDRDL--NRANGLSRAHSSE-----ETS---SVLQPG                                | 49   |
| hsCNGA4 | -----LAPTTNGIGSPPTA-----S-----MSTAEPPD-----PT---NPSTSG                                           | 17   |
| ceTAX-4 | -----KEEPEEAEEAASGVPAKQHPVEVQVEDTADSCPLMAEENPSTVLPSPSPA--KSDTLVPSVSAAGTHRKKLPSEDDAEELKALSPA      | 531  |
| hsCNGB1 | ---NKGEKSLKTSTPTVTEEPHTNIQDKL-----SKNSSDILTNPPDQNAEPTGTVPE-----QKEMDPE                           | 107  |
| hsCNGA1 | ---SENENPHARGSFYSYSLRKG-----PSQREQLPGAIALFVNNSSNKDQEPBEKKKKKK-----EKKSKD--DKNENKND-              | 125  |
| hsCNGA2 | AD---VDAPOQGR-----S-----GFRRIVRLVGIIRWANKNFREERPRDPSFLERFRGPPELQVTTTQEGDGGK-                     | 116  |
| hsCNGA3 | IAETRGLADSGQGSFTGGIARL-----SRLIFL---LRRWAARVHHQDQDPSFDRFRGAELEKVESQESNAQANVGSQD-                 | 125  |
| hsCNGA4 | -----LAPTTNGIGSPPTA-----S-----MSTAEPPD-----PT---NPSTSG                                           | 75   |
| ceTAX-4 | -----ESPVVAVSDPTPKDITDGDRAASTASTNSAIINRLQELVKKLFK-----ERTEKVKKLLDP-----DVTSDDESPPK               | 600  |
| hsCNGB1 | K-----EGNSPQN-----KPPAAPVINEYDAQLHNLVKRKE-----QRTALYKKKIVVEG-----DLSSEASPT                       | 164  |
| hsCNGA1 | -----PEKKKK---KDK---EKKKKEEK-----SKDKKEEKKVEVVIDPSGN-TYINWLFCTITLPMVYNNWMTVIARACFDLQD-           | 194  |
| hsCNGA2 | -----PADRGRSAMFLAK---CNTNTSNN-----GEDKTKKFFVLDVDPAGD-WYICWLFVIAMVLYNWCILVARACFDLQD-              | 169  |
| hsCNGA3 | -----MSQD---TKVKTTES-----SPPASRARKLLVLDPSGD-YYWNLNTMVPVPMYNIILVCRACFPDLQH-                       | 63   |
| hsCNGA4 | -----PAATGGQPASSDGGSAIEVPPKPE-----SYAVRIRKLYANLQDPSD-NFYIYTCVVTVAYIYNLLVFIARQVNDLIGP-            | 151  |
| ceTAX-4 | SPAKKAPAPADTKPAEAEVPEEEHYCDMLCCKFKHRPWK-----KYQFPOSIDLPTNLMYVLWLFVVMAMWNNCWLLPVRWAFPYQTP         | 685  |
| hsCNGB1 | -----AKTAVVPVKE---SDDKPTHEHYRLLWFRVKKMPLTLYLKRILKLPNSIDSYTDRLYLWLLVLYTDAYNWNCCPIPLRIFPYQTA       | 247  |
| hsCNGA1 | -----DYLEWYLIDYVSDIYVLDIM-FVTRRTGYLEOGLLVKEELK-                                                  | 236  |
| hsCNGA2 | -----GYLWVWLVDYVSDIYVLDI-FIRLRTPLEOGLLVKDTKLL                                                    | 211  |
| hsCNGA3 | -----BYLMLWLVLDYSDVLYVLDV-LVRAHGTGFLBQGLMYSINRL                                                  | 239  |
| hsCNGA4 | -----GYLWVWLVDYSDIYVLDIM-VVRFHTGFLEOGLLVVDKGR                                                    | 105  |
| ceTAX-4 | SSQSLCRFYNGTLNSTTQVECTYNMNTMKEMPTYSQYDPLGWSKYWVHFRMLWVFDLMDCVYLDIT-FLNRYRGMYDQGLVREAEKV          | 240  |
| hsCNGB1 | -----DNIHWWLLMDYCDLIYFLDITVFQTRIQFVGGDIIIDDKDM                                                   | 728  |
| hsCNGB3 | -----DNIHWYLIADICDIYLYDMLFIQFRLQVGGDIIYVDSNEL                                                    | 290  |
| hsCNGA1 | INIKYSNLQPKLDVLSLIPDILLYFKLGW-----NYPIRLNRLRFSRMFEFFQRTETRTNYPNIFRISNLVMYIVIIHWNACVF             | 318  |
| hsCNGA2 | RDNYIHTLQFKLDVASIIIPDILYFAVDI-----HSPVFRNRLHFAFMFEFFDRTETRTNYPNIFRISNLVYLIVIHWNACIY              | 293  |
| hsCNGA3 | WQHYYKTTFQPKLDVLSLVPDILAYLVGT-----NYPEVRNRLKLFSLFEFFDRTETRTNYPNMFRIINLVLYLIIIVIHWNACIY           | 321  |
| hsCNGA4 | SSRYVTRVSPFDLDASLMPDIDVYVRLGP-----HTPTLRNRLFRAPRLEAFDRTETRTAYPNAPRIAKMLYIFVVIHWNACIY             | 187  |
| ceTAX-4 | TRAYWQSKQYRIDGSLIPLDYI---LWGPVPIYINWRGLPILRLNRLIRYKRVNRCLERTETRSMPNAPFRVWVWVYIVIIHWNACIY         | 327  |
| hsCNGB1 | RNYLKSRREKMDLISLIPDILYLVKGV-----NPLRLPRCLYMAFFENSRLESILSKAYVVRVIRTTAYLISLHNSCLY                  | 809  |
| hsCNGB3 | RKHYYTQKPKLDVLSLIPDILYLVKGV-----NPLRANRMLYTFEFENHLESIMDKAYVVRVIRTTAYLISLHNSCLY                   | 371  |
| hsCNGA1 | YISIKAIKGFNDITWVYDINDPE----FGRLARKYVYSLYWSLTLITIGETPPVVRDSYEVVVDVFLIGVLIIFATIFGNIGSMISNM         | 403  |
| hsCNGA2 | YAIKSIKGFVDTWVYDINDPE----YGLAREYIYCLYWSLTLITIGETPPVVKDEYLFVDFLIGVLIIFATIVGNVGSMSNM               | 378  |
| hsCNGA3 | FALISKFIKGFDTSDWVYDINDPE----HGRLSKYYIYSLYWSLTLITIGETPPVVKDEYLFVDFLIGVLIIFATIVGNVGSMSNM           | 406  |
| hsCNGA4 | FALSRYLGFGRDAWYDPPAQPC---FERLRQVLYSVEFSLITITIGETPPPARBEYLFVDFLIGVLIIFATIVGNVGSMSNM               | 272  |
| ceTAX-4 | FWSSEWIGLGTDAWYGHKQSLPDDITDILRRVYVSPWSTLITIGETVSPVRIEYAVTLDLMDCVLIFATIVGNVGSMSNM                 | 417  |
| hsCNGB1 | YWASAYQGLGSHHWYDGV-----GNSYIRCYFYAVKLLITIGLPPDKLFEIIVFQLLNFTGVFAFVSMIGQMRDVGAA                   | 886  |
| hsCNGB3 | YWASNYEGIGTTRWYDGE-----GNEYLRXYWAVLITITIGLPEPQTLFELIVFQLLNFTGVFAFVSMIGQMRDVGAA                   | 448  |
| hsCNGA1 | NAARAEFQARIDAIAIKQYMHFRNVSKDMEKRVIKWFDYLVWTKKTVDEKEVLKYLPLDKLRAEIAINVHLDLTKKVRIFADCEAGLLVEVLV    | 493  |
| hsCNGA2 | NATRAEFQAKIDAVKHVMQFRKVSQKMEAKVIRWFDYLVWTKKTVDEKEVLKYLPLDKLRAEIAINVHLDLTKKVRIFADCEAGLLVEVLV      | 468  |
| hsCNGA3 | NATRAEFQAKIDAVKHVMQFRKVSQKMEAKVIRWFDYLVWTKKTVDEKEVLKYLPLDKLRAEIAINVHLDLTKKVRIFADCEAGLLVEVLV      | 468  |
| hsCNGA4 | N7ADAAEFQPDHLLVKKYMKLOHNRKLERRVIDWYQHLQINKMTNEVALIQLHPLERLAEVAVSVLSTLRSVQIFQNCBALELVEVL          | 362  |
| ceTAX-4 | SAARTEFQKMDIKQYMLRKKVSKOLEIRVWFDYLVWTKKTVDEKEVLKYLPLDKLRAEIAINVHLDLTKKVRIFADCEAGLLVEVLV          | 507  |
| hsCNGB1 | TAGQTYRSCMDSTVKYMNYPKPKSVQNRVKTWYETVWDSQGLMDESELMVQLPDKMRLDLADIVNINIVSKVALPQGGCDRQMIFDMLK        | 976  |
| hsCNGB3 | TANQNYFACMDDTIAVNNNSIPKLVQKRVKTVWYETVWDSQGLMDESELMVQLPDKMRLDLADIVNINISKVDLPQGGCDTQMIDMLL         | 538  |
| hsCNGA1 | KLQPQVSPGDYICKKGGDIREMYIIKEGKLAVVA-DDGVTFVFLSDGSGYFGEISILNIRKSGKAGNRRTANIKSIGYSDLFCLSKDDLM       | 582  |
| hsCNGA2 | KLRPQVSPGDYICKKGGDIREMYIIKEGKLAVVA-DDGVTFVFLSDGSGYFGEISILNIRKSGKAGNRRTANIKSIGYSDLFCLSKDDLM       | 557  |
| hsCNGA3 | KLRPTVSPGDYICKKGGDIREMYIINEGKLAVVA-DDGVTFVFLSDGSGYFGEISILNIRKSGKAGNRRTANIKSIGYSDLFCLSKDDLM       | 585  |
| hsCNGA4 | KLQPQVSPGDYICKKGGDIREMYIIKEGKLAVVA-DDGVTFVFLSDGSGYFGEISILNIRKSGKAGNRRTANIKSIGYSDLFCLSKDDLM       | 451  |
| ceTAX-4 | KLQGLVSPGDYICKKGGDIREMYIVKRGRLQVVD-DDGVTQYAVLGDQVFLQEGSVFGEISILNIRKSGKAGNRRTANIKSIGYSDLFCLSKDDLM | 596  |
| hsCNGB1 | RLRSVYVLPNDYVCKKGEIKREMYIIKAGVQVLLGDKKSVLVTILKAGSVFGEISILLAVGG---GNRRTANVVAHGFNTLFDLQKDKLN       | 1063 |
| hsCNGB3 | RLKSVLVPNDYVCKKGEIKREMYIIKAGVQVLLGDPGDKVLTILKAGSVFGEISILLAVGG---GNRRTANVVAHGFNTLFDLQKDKLN        | 625  |
| hsCNGA1 | EALTEYPAKTMLEEKQKILMKDGLLDLNIANAGS-D-----PKDLEEKVT-----RMEGSDVLLQTRFARILAEYESMOQ                 | 653  |
| hsCNGA2 | EAVTEYPAKTVLEERGERILMKEGLLDENEVAT-S-M-----EVDVQKELG-----QLETNMMLTQTRFARILAEYTAGAQ                | 627  |
| hsCNGA3 | EALTEYPAKTMLEEKQKILMKDGLLDLNIANAGS-D-----PKDLEEKVT-----RMEGSDVLLQTRFARILAEYESMOQ                 | 656  |
| hsCNGA4 | EVLSEYPAQGTIMBEKGRILLKMNKLDVNAEAEAL-----QEATESRLR-----GLDQQLDLDLQTRFARILAEYTAGAQ                 | 523  |
| ceTAX-4 | NALREYPAKRLLLKAGREILKDKLDLLENAPTE-----QKTEAEAE-----HLNNAVKVLLQTRFARILAEYTAGAQ                    | 694  |
| hsCNGB1 | EILVHYPEKQILRKKARRMLRSNNK-----PKEEKSVLILPRAAGTPKLFNAALAMTKMGGKAGKGLAHLRKLKLAALAEAA-              | 1145 |
| hsCNGB3 | EILVHYPEKSERILMKARVLLKQAKTAEATPPRKDLALLFPKKEETPKLFTLLGGTGKASLA-----R---LLKLEQAA--                | 700  |
| hsCNGA1 | KLKQRLTKVEKFLKPLIDTE-F---SSIEGPAESGPDIST-----                                                    | 690  |
| hsCNGA2 | KLKQRTVLETKMKQNNEDD-Y---LSDGMNSPELAAADPE-----                                                    | 664  |
| hsCNGA3 | KLRQRLTKVEKFLKPLIDTE-F---SSIEGPAESGPDIST-----                                                    | 694  |
| hsCNGA4 | KIARIIRLELWQTRWMPEDLAEADDEGPEEETGSDDEGRASQEG-----                                                | 575  |
| ceTAX-4 | KLMKRIEMLEKHLRSYKALARRQ-KTMHGVSDIGDGIITDGVDRVRRPPLRQ-----                                        | 729  |
| hsCNGB1 | ---AKQDEL---VEQAKSSQDVKGEI---GSAAPDQHTHPEAAADPPAPRTPEEPPGS-PPSSPPPASLQ-RPE---GEEGPADEPEEH        | 1221 |
| hsCNGB3 | ---QKKNSEGGEEEGKENEKQKEN---EDRKQENEDKGG-ENEDKDKGRPEEKELDRPECTASPIAVEEPEPHVRRVLPGRGTSQ            | 782  |
| ceTAX-4 | SLLK-----                                                                                        | 733  |
| hsCNGB1 | SVRIKMSPPGPEGQILSVKMPPEEREKAE                                                                    | 1251 |
| hsCNGB3 | SIIISMSPASREGGEVLTIEVKKAKQ---                                                                    | 809  |

**Supplementary Fig. 1. Amino acid sequence alignment of human CNG channel subunits and *C. elegans* CNGA subunit TAX-4.** Secondary structures are marked for A3. The SF of CNGA 1-3 is boxed in blue. The cavity gate is boxed in black. Cavity gate-forming residues in A3 are shown in magenta. Cavity gate- and inner gate-forming residues and SF-projecting R403 in B3 are shown in cyan. Residues involved in gating ring/TMD interactions between B3 and A3I and A3III (**Fig. 6c, d**) are shown in red. Residues involved in A'B'/C'D' interactions (**Extended Data Fig. 5**) are shown in green. Missense DAMs in A3 and B3 are highlighted with a yellow and brown background, respectively.
