# Supplementary material
Source: PubMed Central journal article supplement (PMC8776609)

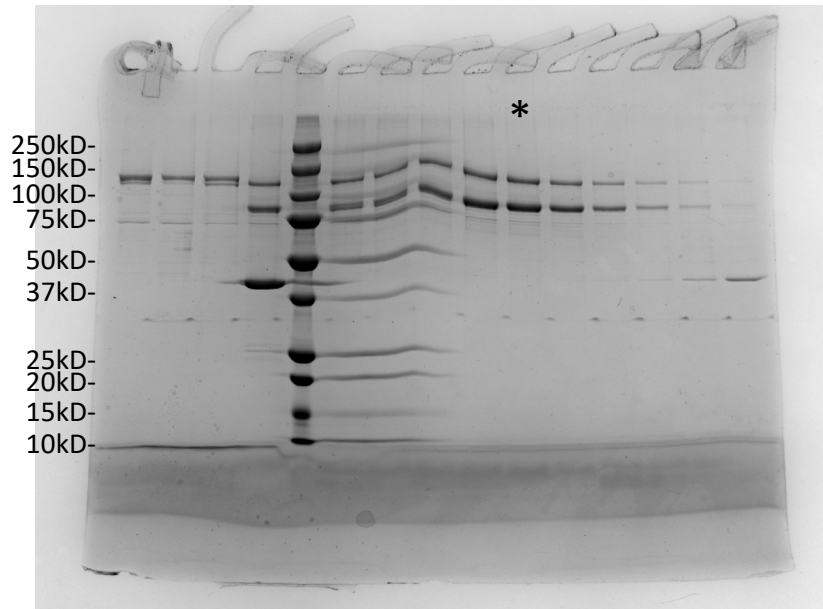

Supplement: NIHMS1762561-supplement-1762561-SD_ED_fig-1.pdf [file NIHMS1762561-supplement-1762561-SD_ED_fig-1.pdf]
